# Supplementary material for: Unraveling Peritoneal Carcinomatosis on Cross-Sectional Imaging Modalities
Source: Preprints.org preprint supplement (doi:10.20944/preprints202305.0576.v1), 2023-05-09
Supplement: Supplementary file 1 [file supplementary:TABLES%20REFERENCES_Ana%20Veron%20UNRAVELING%20PERI.pdf]

**Table 1.** Favoured PC sites and underlying reasons.

| Favoured PC sites                  | Underlying Reason                   |
|------------------------------------|-------------------------------------|
| Ileocecal region                   | Anchor of the small bowel mesentery |
| Sigmoid mesocolon                  | Area of arrested flow               |
| Right paracolic gutter             | Major gravity dependent pathway     |
| Subhepatic space                   | Gravity dependence                  |
| Right subphrenic space and omentum | Resorption sites                    |

| Table 2. Behaviour of peritoneal deposits according to their appearance on MR and CT, their content and the corresponding primary tumour, regardless of the cell line. |        |        |    |                                                                                                                                                                                                                                                                                                                                           |                                                                                                                                                                                                                                                                                                                                                                                                                                                                                                  |
|------------------------------------------------------------------------------------------------------------------------------------------------------------------------|--------|--------|----|-------------------------------------------------------------------------------------------------------------------------------------------------------------------------------------------------------------------------------------------------------------------------------------------------------------------------------------------|--------------------------------------------------------------------------------------------------------------------------------------------------------------------------------------------------------------------------------------------------------------------------------------------------------------------------------------------------------------------------------------------------------------------------------------------------------------------------------------------------|
| Content                                                                                                                                                                | T1     | T2     | CT | Primary tumour                                                                                                                                                                                                                                                                                                                            | Figures                                                                                                                                                                                                                                                                                                                                                                                                                                                                                          |
| Melanin                                                                                                                                                                | ↑      | ↓      | ↓  | Melanoma                                                                                                                                                                                                                                                                                                                                  | 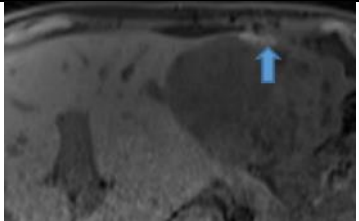 <p><b>Figure 41.</b> Axial NE FST1WI. PC from melanoma: Note the hyperintense melanin-containing perihepatic deposits (arrow).</p>                                                                                                                                                                                                                                                                           |
| Calcium                                                                                                                                                                | ↑=     | ↓=     | ↑  | <p>Mucinous tumors (ovary, stomach, colon, pancreas, appendix, gallbladder, urachus)</p> <p>Serous papillary ovarian tumour</p>                                                                                                                                                                                                           |  <p><b>Figure 42.</b> Axial NE FST1WI. PC from serous ovarian adenocarcinoma: Hyperintense perihepatic deposits (due to calcified content).</p>  <p><b>Figure 48.</b> Axial CE CT. PC from colloid adenocarcinoma of the caecum: Observe the specks of calcification (arrows) scattered throughout the deposits (*).</p> |
| Blood (*)                                                                                                                                                              | ↑<br>↑ | ↓<br>↑ | ↑  | <p>Hypervascular tumours. High-grade ovarian tumours (serous and endometrioid adenocarcinoma). Clear cell ovarian carcinoma Granulosa cell tumour.</p> <p>(*) In the subacute stage of a haematoma, the methemoglobin causes a high SI on T1WI, and a variable SI on T2WI (low in early subacute stage, high in late subacute stage).</p> |  <p><b>Figure 43.</b> Axial NE FST1WI PC from serous ovarian adenocarcinoma: Blood-containing peri and subhepatic deposits (arrows).</p>                                                                                                                                                                                                                                                                    |

Continues

**Table 2. Behaviour of peritoneal deposits..... (continuation)**

| Content                   | T1 | T2 | CT | Primary tumour                                                                     | Figures                                                                                                                                                                                                                                                                                                                                                                                                                                 |
|---------------------------|----|----|----|------------------------------------------------------------------------------------|-----------------------------------------------------------------------------------------------------------------------------------------------------------------------------------------------------------------------------------------------------------------------------------------------------------------------------------------------------------------------------------------------------------------------------------------|
| Myxoid                    | ↓  | ↑  | ↓  | Myxoid tumours                                                                     | 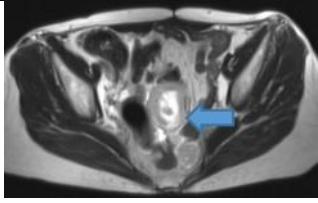 <p><b>Figure 44.</b> Axial T2WI. Myxoid leiomyosarcoma of the uterus: patient with pelvic deposits in the setting of a relapse. Observe the deposit central high SI on T2WI due to the myxoid content.</p>                                                                                                                                          |
| Non mineralized cartilage | ↓  | ↑  | ↓  | Condrosarcoma                                                                      |  <p><b>Figure 45.</b> Axial T2WI. Peritoneal deposit from rib condrosarcoma: Omental deposit showing high SI on T2WI, due to the non-mineralized cartilage content.</p>                                                                                                                                                                              |
| Mucin                     | ↓  | ↑  | ↓  | Mucinous tumours (ovary, stomach, colon, pancreas, appendix, gallbladder, urachus) |  <p><b>Figure 46.</b> Axial T2WI. PC from mucinous adenocarcinoma of the urachus: Hyperintense omental-cake due to mucinous content.</p>                                                                                                                                                                                                           |
| Keratin                   | ↓  | ↑  | ↓  | Squamous differentiation                                                           |  <p><b>Figure 47.</b> Axial T2WI. Bladder adenocarcinoma with a squamous differentiation. Observe the locally advanced vesical tumor (arrow). Note the right pelvic peritoneal deposit (arrowhead), showing the same imaging features as the tumour. The high signal on T2WI may be due to the keratin formed by the squamous differentiation.</p> |

| <b>Table 3.</b> Relation between vascular pattern of the deposits and differential diagnosis of possible primary tumours.                                                                                                                                                                                                                                                                                                                                                |                                                                                                                                                                                                                                                                                                                                                                                                                                                      |
|--------------------------------------------------------------------------------------------------------------------------------------------------------------------------------------------------------------------------------------------------------------------------------------------------------------------------------------------------------------------------------------------------------------------------------------------------------------------------|------------------------------------------------------------------------------------------------------------------------------------------------------------------------------------------------------------------------------------------------------------------------------------------------------------------------------------------------------------------------------------------------------------------------------------------------------|
| <b>Hypervascular deposits</b>                                                                                                                                                                                                                                                                                                                                                                                                                                            | <b>Hypovascular deposits</b>                                                                                                                                                                                                                                                                                                                                                                                                                         |
| Ovarian (clear cell, granulosa)                                                                                                                                                                                                                                                                                                                                                                                                                                          | Mucinous tumours (ovary, stomach, colon, pancreas, appendix, gallbladder, urachus)                                                                                                                                                                                                                                                                                                                                                                   |
| Breast carcinoma                                                                                                                                                                                                                                                                                                                                                                                                                                                         | Pancreas adenocarcinoma                                                                                                                                                                                                                                                                                                                                                                                                                              |
| Lung carcinoma                                                                                                                                                                                                                                                                                                                                                                                                                                                           | Liposarcoma (myxoid or undifferentiated)                                                                                                                                                                                                                                                                                                                                                                                                             |
| Melanoma                                                                                                                                                                                                                                                                                                                                                                                                                                                                 |                                                                                                                                                                                                                                                                                                                                                                                                                                                      |
| Sarcoma:<br>- GIST<br>-Leiomyosarcoma<br>-Fibrous solitary tumour                                                                                                                                                                                                                                                                                                                                                                                                        |                                                                                                                                                                                                                                                                                                                                                                                                                                                      |
| Renal cell carcinoma                                                                                                                                                                                                                                                                                                                                                                                                                                                     |                                                                                                                                                                                                                                                                                                                                                                                                                                                      |
| Neuroendocrine tumours                                                                                                                                                                                                                                                                                                                                                                                                                                                   |                                                                                                                                                                                                                                                                                                                                                                                                                                                      |
| Hepatocellular carcinoma                                                                                                                                                                                                                                                                                                                                                                                                                                                 |                                                                                                                                                                                                                                                                                                                                                                                                                                                      |
| Thyroid carcinoma                                                                                                                                                                                                                                                                                                                                                                                                                                                        |                                                                                                                                                                                                                                                                                                                                                                                                                                                      |
| Paraganglioma                                                                                                                                                                                                                                                                                                                                                                                                                                                            |                                                                                                                                                                                                                                                                                                                                                                                                                                                      |
| Choriocarcinoma                                                                                                                                                                                                                                                                                                                                                                                                                                                          |                                                                                                                                                                                                                                                                                                                                                                                                                                                      |
| <div> <div><b>A</b></div> 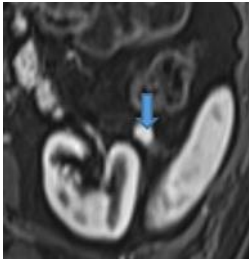 <div><b>B</b></div>  </div> <p><b>Figure 49.</b> Axial CE portal phase FST1WI. PC from clear cell renal carcinoma: Note the hypervascular deposit adjacent to the spleen that was mistaken for an accessory spleen (A). Observe the growth on the follow-up CT (B).</p> | <div> <div><b>A</b></div>  <div><b>B</b></div>  </div> <p><b>Figure 50.</b> Coronal MPR CE CT PC from pancreatic cystadenocarcinoma: Observe the primary tumour (A) and its deposit within the sigmoid mesocolon (B). Notice the hypovascular resemblance between them.</p> |

| Table 4. Differential diagnosis                                                                  |                                                                                                  |                                                                                                   |                                                                                                    |
|--------------------------------------------------------------------------------------------------|--------------------------------------------------------------------------------------------------|---------------------------------------------------------------------------------------------------|----------------------------------------------------------------------------------------------------|
| Inflammatory                                                                                     | Infectious                                                                                       | Benign<br>non-inflammatory<br>non-infectious                                                      | Malignant                                                                                          |
| Omental infarction                                                                               | Peritoneal tuberculosis                                                                          | Splenosis<br>Accessory spleen                                                                     | Primary peritoneal<br>serous carcinoma                                                             |
| <br>Figure 51   | <br>Figure 56   | <br>Figure 59   | <br>Figure 65   |
| Peritoneal amyloidosis                                                                           | Peritoneal echinococcosis                                                                        | Bowel perforation                                                                                 | Pseudomyxoma<br>peritoneal                                                                         |
| <br>Figure 52  | <br>Figure 57  | <br>Figure 60  | <br>Figure 66  |
| Peritoneal sarcoidosis                                                                           |                                                                                                  | Encapsulated omental fat<br>necrosis                                                              | Peritoneal malignant<br>mesothelioma                                                               |
| <br>Figure 53 | <br>Figure 58 | <br>Figure 61 | <br>Figure 67 |
| Familial Mediterranean<br>fever                                                                  |                                                                                                  | Endometriosis                                                                                     | Desmoplastic small round<br>cell tumour                                                            |
| <br>Figure 54 |                                                                                                  | <br>Figure 62 | <br>Figure 68 |

Continues

**Table 4.** Differential diagnosis (continuation)

| Inflammatory                                                                                   | Infectious | Benign<br>non-inflammatory<br>non-infectious                                                    | Malignant                                                                                        |
|------------------------------------------------------------------------------------------------|------------|-------------------------------------------------------------------------------------------------|--------------------------------------------------------------------------------------------------|
| Encapsulated sclerosing<br>peritonitis                                                         |            | Leiomyomatosis<br>peritonealis                                                                  | Peritoneal<br>lymphomatosis                                                                      |
| 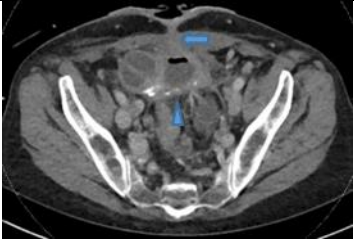<br>Figure 55 |            | <br>Figure 63 | <br>Figure 69 |
|                                                                                                |            | Desmoid tumours                                                                                 | Peritoneal sarcomatosis                                                                          |
|                                                                                                |            | <br>Figure 64 | <br>Figure 70 |

## References

1. Flanagan, M.; Solon, J. Peritoneal metastases from extra-abdominal cancer - A population-based study. *Eur J Surg Oncol.* 2018, 44(11), 1811-1817. doi: 10.1016/j.ejso.2018.07.049.
2. Desai, J.P.; Moustarah, F. Peritoneal Metastasis. In: StatPearls [Internet]. Treasure Island (FL): StatPearls Publishing, 2022.
3. González-Moreno, S.; González-Bayón, L. Imaging of peritoneal carcinomatosis. *Cancer J Sudbury Mass.* 2009, 15(3), 184-9.
4. Patel, C.M.; Sahdev, A. CT, MRI and PET imaging in peritoneal malignancy. *Cancer Imaging.* 2011, 11(1), 123-39.
5. Van 't Sant, I.; Engbersen, M.P. Diagnostic performance of imaging for the detection of peritoneal metastases: a meta-analysis. *Eur Radiol.* 2020, 30(6), 3101-12.
6. Cianci, R.; Delli Pizzi, A. Magnetic Resonance Assessment of Peritoneal Carcinomatosis: Is There a True Benefit from Diffusion-Weighted Imaging? *Curr Probl Diagn Radiol.* 2020, 49, 392-7.
7. Low, R.N. Magnetic Resonance Imaging in the Oncology Patient: Evaluation of the Extrahepatic Abdomen. *Semin Ultrasound CT MRI.* 2005, 26(4), 224-36.
8. Kim, S.J.; Lee, S.W. Diagnostic accuracy of (18)F-FDG PET/CT for detection of peritoneal carcinomatosis; a systematic review and meta-analysis. *Br J Radiol.* 2018, 91, 20170519
9. Cabral, F.C.; Krajewski, K.M. Peritoneal lymphomatosis: CT and PET/CT findings and how to differentiate between carcinomatosis and sarcomatosis. *Cancer Imaging.* 2013, 13(2), 162-70. doi: 10.1102/1470-7330.2013.0018.
10. Low, R.N. MR imaging of the peritoneal spread of malignancy. *Abdom Imaging.* 2007, 32, 267-83. doi: 10.1007/s00261-007-9210-8
11. Tirkes, T.; Sandrasegaran, K. Peritoneal and retroperitoneal anatomy and its relevance for cross-sectional imaging. *Radiographics.* 2012, 32(2), 437-51.
12. Gore, R.M.; Levine, L.S. Textbook of gastrointestinal radiology. 3rd ed.; Saunders, 2007; pp. 2071-97.
13. Meyers, M.A.; Oliphant, M. The peritoneal ligaments and mesenteries: pathways of intraabdominal spread of disease. *Radiology.* 1987, 163, 593-604.
14. Nougaret, S.; Addley, H.C. Ovarian carcinomatosis: how the radiologist can help plan the surgical approach. *Radiographics.* 2012, 32(6), 1775-800.
15. Akin, O.; Sala, E. Perihepatic metastases from ovarian cancer: sensitivity and specificity of CT for the detection of metastases with and those without liver parenchymal invasion. *Radiology.* 2008, 248(2), 511-517.
16. Winston, C.B.; Hadar, O. Metastatic lobular carcinoma of the breast: patterns of spread in the chest, abdomen, and pelvis on CT. *AJR Am J Roentgenol.* 2000, 175(3), 795-800. doi: 10.2214/ajr.175.3.1750795.
17. Healy, J.C.; Reznick, R.H. The peritoneum, mesenteries and omenta: normal anatomy and pathological processes. *Eur Radiol.* 1998, 8(6), 886-900. doi: 10.1007/s003300050485. PMID: 9683690.
18. Xu, Y.; Yang, J. MRI for discriminating metastatic ovarian tumors from primary epithelial ovarian cancers. *J Ovarian Res.* 2015, 8, 61. doi: 10.1186/s13048-015-0188-5.
19. Zulfiqar, M.; Koen, J. Krukenberg Tumors: Update on Imaging and Clinical Features. *AJR Am J Roentgenol.* 2020, 215(4), 1020-1029. doi: 10.2214/AJR.19.22184.
20. Kim, S.H.; Kim, W.H. CT and MR findings of Krukenberg tumors: comparison with primary ovarian tumors. *Journal of Computer Assisted Tomography.* 1996, 20(3), 393-8.
21. Saif, M.W.; Siddiqui, I.A. Management of ascites due to gastrointestinal malignancy. *Ann Saudi Med.* 2009, 29(5), 369-377.
22. Chang, D.K.; Kim, J.W. Clinical significance of CT-defined minimal ascites in patients with gastric cancer. *World J Gastroenterol.* 2005, 11(42), 6587.
23. Meyers, M.A. Intraperitoneal seeding: pathways of spread and localization. In: Meyers' dynamic radiology of the abdomen, 6th ed.; Meyers, M.A., Charnsangavej, C.; Springer, New York, 2000, pp. 69-105.
24. Coakley, F.V.; Hricak, H. Imaging of peritoneal and mesenteric disease: key concepts for the clinical radiologist. *Clin Radiol.* 1999, 54(9), 563-574.
25. Feldman, G.B.; Knapp, R.C. Lymphatic drainage of the peritoneal cavity and its significance in ovarian cancer. *Am J Obstet Gynecol.* 1974, 119, 991-994.
26. Seltzer, S.E. Analysis of the tethered-bowel sign on abdominal CT as a predictor of malignant ascites. *Gastrointest Radiol.* 1987, 12, 245-249. doi : 10.1007/BF01885152
27. Leitner, M.J.; Jordan, C.G. Torsion, infarction and hemorrhage of the omentum as a cause of acute abdominal distress. *Ann Surg.* 1952, 135(1), 103-10.
28. Pereira, J.M.; Sirlin, C.B. Disproportionate fat stranding: a helpful CT sign in patients with acute abdominal pain. *Radiographics.* 2004, 24(3), 703-715.

29. 29. Pickhardt, P.J.; Bhalla S. Unusual nonneoplastic peritoneal and subperitoneal conditions: CT findings. *Radiographics*. 2005, 25, 719–30.
30. 30. Kim, M.S.; Ryu J.A. Amyloidosis of the mesentery and small intestine presenting as a mesenteric haematoma. *Br J Radiol*. 2008, 81, e1–3.
31. 31. Iannuzzi, M.C.; Rybicki, B.A. Sarcoidosis. *New Engl J Med*. 2007, 357, 2153–65.
32. 32. Gezer, N.S.; Basara, I. Abdominal sarcoidosis: cross-sectional imaging findings. *Diagn Interv Radiol*. 2015, 21, 111–7.
33. 33. Zissin, R.; Rathaus, V. CT findings in patients with familial Mediterranean fever during an acute abdominal attack. *Br J Radiol*. 2003, 76(901), 22–5. doi: 10.1259/bjr/32051823.
34. 34. Bhatt, H.; Cascella, M. Familial Mediterranean Fever. In: *StatPearls* [Internet]. Treasure Island (FL): StatPearls Publishing, 2022.
35. 35. Manphool, S.; Satheesh, K. Encapsulating peritoneal sclerosis: the abdominal cocoon. *Radiographics*. 2019, 39(1), 62–77.
36. 36. Singhal, M.; Krishna S. Encapsulating Peritoneal Sclerosis: The Abdominal Cocoon. *Radiographics*. 2019, 39(1), 62–77. doi: 10.1148/rg.2019180108.
37. 37. Uygur-Bayramicli, O.; Dabak, G. A clinical dilemma: abdominal tuberculosis. *World J Gastroenterol*. 2003, 9(5), 1098–101. doi: 10.3748/wjg.v9.i5.1098.
38. 38. Burrill, J.; Williams, C.J. Tuberculosis: a radiologic review. *Radiographics*. 2007, 27(5), 1255–73. doi: 10.1148/rg.275065176.
39. 39. Pedrosa, I.; Saiz, A. Hydatid disease: radiologic and pathologic features and complications. *Radiographics*. 2000, 20(3), 795–817. doi: 10.1148/radiographics.20.3.g00ma06795.
40. 40. Moro, P.; Schantz, P.M. Echinococcosis: a review. *Int J Infect Dis*. 2009, 13(2), 125–33. doi:10.1016/j.ijid.2008.03.037
41. 41. Zalaquett, E.; Menias, C. Imaging of hydatid disease with a focus on extrahepatic involvement. *Radiographics*. 2007, 27, 901–923.
42. 42. McManus, D.P.; Zhang, W. Echinococcosis. *Lancet*. 2003, 362(9392), 1295–1304.
43. 43. Sato, N.; Abe, T. Intrahepatic splenosis in a chronic hepatitis C patient with no history of splenic trauma mimicking hepatocellular carcinoma. *Am J Case Rep*. 2014, 15, 416–20.
44. 44. Leong, C.W.; Menon, T. Post-Traumatic Intrahepatic Splenosis Mimicking a Neuroendocrine Tumour. *BMJ Case Rep*. 2013.
45. 45. Gruen, D.R.; Gollub, M. Intrahepatic splenosis mimicking hepatic adenoma. *AJR Am J Roentgenol*. 1997, 168, 725–726.
46. 46. Drake, A.; Dhundee, J. Disseminated leiomyomatosis peritonealis in association with oestrogen secreting ovarian fibrothecoma. *BJOG*. 2001, 108(6), 661–4. doi: 10.1111/j.1471-0528.2001.00132.x.
47. 47. Kumar, S.; Sharma, J.B. Disseminated peritoneal leiomyomatosis: an unusual complication of laparoscopic myomectomy. *Arch Gynecol Obstet*. 2008, 278(1), 93–5. doi: 10.1007/s00404-007-0536-9. Epub 2008 Jan 12. PMID: 18193441.
48. 48. Surmacki, P.; Sporny, S. Disseminated peritoneal leiomyomatosis coexisting with leiomyoma of the uterine body. *Arch Gynecol Obstet*. 2006, 273(5), 301–3. doi: 10.1007/s00404-005-0086-y.
49. 49. Sinha, A.; Hansmann, A. Imaging assessment of desmoid tumours in familial adenomatous polyposis: is state-of-the-art 1.5 T MRI better than 64-MDCT? *Br J Radiol*. 2012, 85(1015), e254–261
50. 50. Brooks, A.P.; Reznick R.H. CT appearances of desmoid tumours in familial adenomatous polyposis: further observations. *Clin Radiol*. 1994, 49, 601–607
51. 51. Robinson, W.A.; McMillan C. Desmoid tumors in pregnant and postpartum women. *Cancers (Basel)*. 2012, 4(1), 184–192
52. 52. Li, X.; Yang, Q. Differences between primary peritoneal serous carcinoma and advanced serous ovarian carcinoma: a study based on the SEER database. *J Ovarian Res*. 2021, 14, 40 (2021). doi: 10.1186/s13048-021-00788-y
53. 53. Morita, H.; Aoki, J. Serous surface papillary carcinoma of the peritoneum: clinical, radiologic, and pathologic findings in 11 patients. *American Journal of Roentgenology*. 2004, 183(4), 923–928.
54. 54. Diop, A.D.; Fontarensky, M. CT imaging of peritoneal carcinomatosis and its mimics. *Diagn Interv Imaging*. 2014, 95(9), 861–72. doi: 10.1016/j.diii.2014.02.009.
55. 55. Sugarbaker, P.H. Pseudomyxoma peritonei. A cancer whose biology is characterized by a redistribution phenomenon. *Ann Surg*. 1994, 219(2), 109–11. doi: 10.1097/0000658-199402000-00001.
56. 56. Mittal, R.; Chandramohan, A. Pseudomyxoma peritonei: natural history and treatment. *Int J Hyperthermia*. 2017, 33(5), 511–519.
57. 57. Ronnett, B.M.; Yan H. Patients with pseudomyxoma peritonei associated with disseminated peritoneal adenomucinosis have a significantly more favorable prognosis than patients with peritoneal mucinous carcinomatosis. *Cancer*. 2001, 92(1), 85–91. doi: 10.1002/1097-0142(20010701)92:1<85::aid-cncr1295>3.0.co;2-r.



58. 58. Broeckx, G.; Pauwels P. Malignant peritoneal mesothelioma: a review. *Transl Lung Cancer Res.* 2018, 7(5), 537-542. doi: 10.21037/tlcr.2018.10.04.
59. 59. Chen, J.; Wu, Z. Intra-abdominal desmoplastic small round cell tumors: CT and FDG-PET/CT findings with histopathological association. *Oncol Lett.* 2016, 11, 3298-3302.
60. 60. Yoo, E.; Kim, J.H. Greater and lesser omenta: normal anatomy and pathologic processes. *Radiographics.* 2007, 27(3), 707-20. doi: 10.1148/rg.273065085.
61. 61. Karaosmanoglu D, Karcaaltincaba M, Oguz B, Akata D, Ozmen M, Akhan O. CT findings of lymphoma with peritoneal, omental and mesenteric involvement: peritoneal lymphomatosis. *Eur J Radiol.* 2009, 71(2), 313-7. doi: 10.1016/j.ejrad.2008.04.012.
62. 62. Hardy, S.M. Signs in imaging: the sandwich sign. *Radiology.* 2003, 226(3), 651–652.
63. 63. Kim, Y.; Cho, O. Peritoneal lymphomatosis: CT findings. *Abdom Imaging.* 1998, 23, 87–90. doi: 10.1007/s002619900292.
64. 64. Wong, S.; Sanchez, T.R.S. Diffuse peritoneal lymphomatosis: atypical presentation of Burkitt lymphoma. *Pediatric radiology.* 2009, 39, 274-276.
65. 65. Balthazar, E.J.; Noordhoorn, M. CT of small-bowel lymphoma in immunocompetent patients and patients with AIDS: comparison of findings. *AJR Am J Roentgenol.* 1997, 168(3), 675-680.
66. 66. Tamara, N.O.; Jyothi, P. Peritoneal sarcomatosis versus peritoneal carcinomatosis: imaging findings at MDCT. *AJR Am J Roentgenol.* 2010, 195(3), W229-35.
67. 67. Bilimoria, M.M.; Holtz, D.J. Tumor volume as a prognostic factor for sarcomatosis. *Cancer.* 2002, 94(9), 2441-6. doi: 10.1002/cncr.10504.
68. 68. Oei, T.N.; Jagannathan, J.P. Peritoneal sarcomatosis versus peritoneal carcinomatosis: imaging findings at MDCT. *AJR Am J Roentgenol.* 2010, 195(3), W229-35.
